# Supplementary material for: A 2-Year Wencheng Waxy Yam Pesticide Residues Investigation and Quality Evaluation
Source: Preprints.org preprint supplement (doi:10.20944/preprints202309.2132.v1), 2023-09-30
Supplement: Supplementary file 1 [file supplementary]

Table S1 Pesticide detection parameters of four fruits (68 pesticides)

| **Number** | **Pesticides** | **Main effect** | **ADI**  **(mg/kg bw)** | **LOD (μg/kg)** |
| --- | --- | --- | --- | --- |
| 1 | Abamectin | Insecticide | 0.001 | 2.62 |
| 2 | Acephate | Insecticide | 0.03 | 0.95 |
| 3 | Acetamiprid | Insecticide | 0.07 | 0.085 |
| 4 | Aldicarb | Insecticide | 0.003 | 2.55 |
| 5 | Azoxystrobin | fungicide | 0.2 | 0.42 |
| 6 | Bifenthrin | Insecticide/Acaricide | 0.01 | 4.1 |
| 7 | Carbaryl | Insecticide | 0.008 | 0.06 |
| 8 | Carbendazim | fungicide | 0.03 | 1.05 |
| 9 | Carbofuran | Insecticide | 0.001 | 0.12 |
| 10 | Chlorantraniliprole | Insecticide | 2 | 0.37 |
| 11 | Chlorbenzuron | Insecticide | 1.25 | 0.54 |
| 12 | Chlorfenapyr | Insecticide | 0.03 | 0.22 |
| 13 | Chlorfluazuron | Insecticide | 0.005 | 2.75 |
| 14 | Chlorothalonil | fungicide | 0.02 | 2.65 |
| 15 | Chlorpyrifos | Insecticide | 0.01 | 0.24 |
| 16 | Cyfluthrin | Insecticide | 0.04 | 1.82 |
| 17 | Cyhalothrin | Insecticide | 0.02 | 2.11 |
| 18 | Cypermethrin | Insecticide | 0.02 | 2.45 |
| 19 | Cyromazine | Insecticide | 0.06 | 2.31 |
| 20 | Deltamethrin | Insecticide | 0.01 | 2.64 |
| 21 | Diazinon | Insecticide | 0.005 | 0.22 |
| 22 | Dichlorvos | Insecticide | 0.004 | 3 |
| 23 | Dicofol | Acaricide | 0.002 | 0.58 |
| 24 | Difenoconazole | fungicide | 0.01 | 0.25 |
| 25 | Diflubenzuron | Insecticide | 0.02 | 2.55 |
| 26 | Dimethoate | Insecticide | 0.002 | 0.46 |
| 27 | Dimethomorph | fungicide | 0.2 | 0.75 |
| 28 | Emamectin benzoate | Insecticide | 0.0005 | 0.075 |
| 29 | Etofenprox | Insecticide | 0.03 | 2.41 |
| 30 | Fenitrothion | Insecticide | 0.006 | 1.23 |
| 31 | Fenpropathrin | Insecticide | 0.03 | 2.15 |
| 32 | Fenvalerate | Insecticide | 0.02 | 2.35 |
| 33 | Fipronil | Insecticide | 0.0002 | 1.77 |
| 34 | Flucythrinate | Insecticide | 0.02 | 1.75 |
| 35 | Forchlorfenuron | Plant growth regulator | 0.07 | 0.85 |
| 36 | HCH | Insecticide | 0.005 | 0.5 |
| 37 | Imidacloprid | Insecticide | 0.06 | 0.7 |
| 38 | Iprodione | fungicide | 0.06 | 3.5 |
| 39 | Isocarbophos | Insecticide | 0.003 | 1.63 |
| 40 | Isofenphos-methyl | Insecticide | 0.003 | 2.12 |
| 41 | Malathion | Insecticide | 0.3 | 0.05 |
| 42 | Metalaxy | fungicide | 0.08 | 0.77 |
| 43 | Methamidophos | Insecticide | 0.004 | 0.95 |
| 44 | Methomyl | Insecticide | 0.02 | 2.65 |
| 45 | Omethoate | Insecticide | 0.0003 | 1.65 |
| 46 | Paclobutrazol | Plant growth regulator | 0.1 | 0.37 |
| 47 | Parathion | Insecticide | 0.004 | 2.11 |
| 48 | Parathion-methyl | Insecticide | 0.003 | 1.42 |
| 49 | Pendimethalin | herbicide | 0.1 | 2.23 |
| 50 | permethrin | Insecticide | 0.05 | 2.66 |
| 51 | Phorate | Insecticide | 0.0007 | 2.16 |
| 52 | Phosalone | Insecticide | 0.02 | 0.5 |
| 53 | Phosmet | Insecticide | 0.01 | 0.27 |
| 54 | Phoxim | Insecticide | 0.004 | 0.5 |
| 55 | Prochloraz | fungicide | 0.01 | 0.39 |
| 56 | Procymidone | fungicide | 0.1 | 2.11 |
| 57 | Profenofos | Insecticide | 0.03 | 0.3 |
| 58 | Propamocarb | fungicide | 0.4 | 0 |
| 59 | Pyraclostrobin | fungicide | 0.03 | 0.52 |
| 60 | Pyridaben | Acaricide | 0.01 | 1.3 |
| 61 | Pyrimethanil | fungicide | 0.2 | 0.17 |
| 62 | Quintozene | fungicide | 0.01 | 0.35 |
| 63 | Taufluvalinate | Insecticide | 0.003 | 0.42 |
| 64 | Tebufenozide | Insecticide | 0.02 | 1.54 |
| 65 | Thiamethoxam | Insecticide | 0.08 | 1.24 |
| 66 | Triadimefon | fungicide | 0.03 | 0.75 |
| 67 | Triazophos | Insecticide | 0.001 | 0.011 |
| 68 | Vinclozolin | fungicide | 0.01 | 0.32 |

*Note.* ADI is the acceptable daily intake (mg kg-1 bw). The ADIs of pesticides were used according to the National Food Safety Standard-MRLs for Pesticides in Food (Ministry of Agriculture and Rural Affairs of the People's Republic of China, 2021). LOD is Limit of detection.

Table S2 Detection concentrations of pesticides in waxy yam samples

| planting sites | Sample number | azoxystrobin | prochloraz | carbendazim |
| --- | --- | --- | --- | --- |
| 1 | 1-1  1-2 | n.d. | n.d. | n.d. |
|  | n.d. | n.d. | n.d. |
|  | 1-3 | n.d. | n.d. | n.d. |
|  | 1-4 | n.d. | n.d. | n.d. |
|  | 1-5 | n.d. | n.d. | n.d. |
|  | 1-6 | n.d. | n.d. | n.d. |
| 2 | 2-1 | n.d. | n.d. | n.d. |
|  | 2-2 | n.d. | n.d. | n.d. |
|  | 2-3 | n.d. | n.d. | n.d. |
|  | 2-4 | n.d. | n.d. | n.d. |
|  | 2-5 | n.d. | n.d. | n.d. |
|  | 2-6 | n.d. | n.d. | n.d. |
| 3 | 3-1 | n.d. | n.d. | n.d. |
|  | 3-2 | **0.012** | n.d. | n.d. |
|  | 3-3 | n.d. | n.d. | n.d. |
|  | 3-4 | n.d. | n.d. | **0.049** |
|  | 3-5 | **0.025** | n.d. | n.d. |
|  | 3-6 | n.d. | n.d. | n.d. |
| 4 | 4-1 | n.d. | n.d. | n.d. |
|  | 4-2 | n.d. | n.d. | n.d. |
|  | 4-3 | n.d. | **0.027** | n.d. |
|  | 4-4 | **0.031** | n.d. | **0.036** |
|  | 4-5 | n.d. | **0.022** | n.d. |
|  | 4-6 | n.d. | n.d. | n.d. |
| 5 | 5-1 | n.d. | n.d. | n.d. |
|  | 5-2  5-3  5-4 | **0.008** | **0.011** | n.d. |
|  | n.d. | n.d. | **0.022** |
|  | n.d. | n.d. | n.d. |
|  | 5-5 | n.d. | n.d. | n.d. |
|  | 5-6 | **0.033** | n.d. | n.d. |
| 6 | 6-1 | n.d. | **0.024** | n.d. |
|  | 6-2 | **0.012** | **0.007** | **0.009** |
|  | 6-3 | n.d. | n.d. | n.d. |
|  | 6-4 | n.d. | n.d. | n.d. |
|  | 6-5 | **0.017** | n.d. | n.d. |
|  | 6-6 | n.d. | n.d. | **0.014** |
| 7 | 7-1 | n.d. | n.d. | n.d. |
|  | 7-2 | n.d. | n.d. | n.d. |
|  | 7-3 | **0.021** | n.d. | **0.015** |
|  | 7-4 | n.d. | n.d. | n.d. |
|  | 7-5 | n.d. | n.d. | n.d. |
|  | 7-6 | n.d. | n.d. | n.d. |
|  | 7-6 | **0.027** | n.d. | n.d. |

n.d.: not detected
